# Supplementary material for: Use of Generative AI to Identify Helmet Status Among Patients With Micromobility-Related Injuries From Unstructured Clinical Notes
Source: PubMed Central journal article supplement (PMC11322845; doi:10.1001/jamanetworkopen.2024.25981), 2024-08-13
Supplement: jamanetwopen-e2425981-s001.pdf [file jamanetwopen-e2425981-s001.pdf]

## Supplemental Online Content

Burford KG, Itzkowitz NG, Ortega AG, Teitler JO, Rundle AG. Use of generative AI to identify helmet status among patients with micromobility-related injuries from unstructured clinical notes. *JAMA Netw Open*. 2024;7(8):e2425981. doi:10.1001/jamanetworkopen.2024.25981

**eTable 1.** Product Codes and Text-String Terms Used to Generate Micromobility Variables in the National Electronic Injury Surveillance System Data, 2019-2022

**eTable 2.** Researcher-Generated Text-String Terms for “Helmet” Indicator Within 2019-2022 NEISS Dataset

**eMethods.** Comprehensive Inputs (Prompts) and Outputs From ChatGPT-4 Sessions

This supplemental material has been provided by the authors to give readers additional information about their work.

**eTable 1. Product codes and text-string terms used to generate micromobility variables in the National Electronic Injury Surveillance System data, 2019-2022.<sup>a</sup>**

| <b>Micromobility mode</b> | <b>Product codes, 2019</b>                                                                                                        | <b>Product codes, 2020-2022</b>                                                                                                   | <b>Narrative text search terms</b>                                                                                                   |
|---------------------------|-----------------------------------------------------------------------------------------------------------------------------------|-----------------------------------------------------------------------------------------------------------------------------------|--------------------------------------------------------------------------------------------------------------------------------------|
| Powered scooter           | 5042 (scooters/skateboards, powered)                                                                                              | 5022 (rideshare or rental scooter or scooters, powered)                                                                           | 'scooter'                                                                                                                            |
| Hoverboard                | 5042 (standup scooter/skateboard, powered)                                                                                        | 5025 (hoverboards and powered skateboards)                                                                                        | 'hoverboard' or 'hooverboard' or 'hover board' or 'hoover board' or 'hoverbaord—hooverbaord' or 'hover boad' or 'hoverboad' or hover |
| E-bike                    | 5035 (minibikes, powered)<br>3215 (mopeds or power-assisted cycles)                                                               | 5035 (minibikes, powered)<br>3215 (electric bikes (e-bikes) or mopeds or power-assisted cycles)                                   | 'elect' or 'batt' or 'motor' and 'bike' or 'bicycle'                                                                                 |
| Bicycle                   | 5040 (bicycles or accessories (excl. mountain or all-terrain bicycles))<br>5033 (mountain or all-terrain bicycles or accessories) | 5040 (bicycles or accessories (excl. mountain or all-terrain bicycles))<br>5033 (mountain or all-terrain bicycles or accessories) |                                                                                                                                      |

**eTable 2. Researcher-generated text-string terms for “helmet” indicator within 2019-2022 NEISS dataset.<sup>a</sup>**

| Helmet Indicator   | Search Terms                                                                                                                                                                                                                                                                                                                                                                                                                                                                                                                                                                                                                                                                                                                                                                                                                                                                                                                                                                                                                                                                                                 |
|--------------------|--------------------------------------------------------------------------------------------------------------------------------------------------------------------------------------------------------------------------------------------------------------------------------------------------------------------------------------------------------------------------------------------------------------------------------------------------------------------------------------------------------------------------------------------------------------------------------------------------------------------------------------------------------------------------------------------------------------------------------------------------------------------------------------------------------------------------------------------------------------------------------------------------------------------------------------------------------------------------------------------------------------------------------------------------------------------------------------------------------------|
| Not wearing helmet | "NO HELMET", "WITHOUT A HELMET", "WITHOUT HELMET", "NEGATIVE FOR HELMET", "NEGATIVE FOR A HELMET", "NOT HELMETED", "-HELMET", "- HELMET", "NOT WEARING HELMET", "NOT WEARING A HELMET", "UNHELMETED", "W/O HELMET", "DID NOT HAVE ON A HELMET", "NO WEARING HELMET", "DID NOT HAVE A HELMET", "DID NOT HAVE HELMET", "W/O A HELMET", "WITHOUT WEARING HELMET", "WITHOUT WEARING A HELMET", "REMOVED HELMET", "DENIED HELMET", "DENIED USE OF HELMET", "DENIED USE OF A HELMET", "HELMETLESS", "W/OUT HELMET", "DENIES HELMET", "WITH OUT HELMET", "WITH OUT A HELMET", "NOT WEAR A HELMET", "NOT WEAR HELMET", "WO A HELMET", "-HELMET", "NEGATIVE HELMET", "WIHTOUT A HELMET", "NOT WEARIING HELMET", "NOT WEARINNG A HELMET", "NOT WEARIG HELMET"                                                                                                                                                                                                                                                                                                                                                          |
| Wearing helmet     | "WITH A HELMET", "WITH HELMET", "POSITIVE FOR HELMET", "POSITIVE FOR A HELMET", "HELMETED", "WEARING HELMET", "WEARING A HELMET", "W/ HELMET", "W HELMET", "WORE HELMET", "W/HELMET", "W/ A HELMET", "HAD ON A HELMET", "HAD ON HELMET", "HAD HELMET", "HAD A HELMET", "HIS HELMET", "HER HELMET", "PT HELMET", "PTS HELMET", "WAS WEARING A HELMET", ",HELMET", "CRACKED HELMET", "CRACKING HELMET", "HELMET CRACKED", "HELMET ON", "BROKE HELMET", "HELMET BROKE", "BREAKING HELMET", "POSITIVE HELMET", "WORE HELMET", "WEARING A BIKE HELMET", "WEARING A FULL FACE HELMET", "WEARING FULL FACE HELMET", "INCLUDING HELMET", " FULL HELMET", "PT'S HELMET", "HELMET FELL", "SMASHED HELMET", "PLUS HELMET", "HELMET WAS FRACTURED", "HELMET WAS BROKEN", "WEARING BIKE HELMET", "ENDORSES HELMET", "HELMET WENT OFF", "FULL FACE MASK HELMET", "& HELMET", "HELMET WAS REPORTED TO BE CRACKED", "HELMETD", "WHELMET", "+HELMET", "+ HELMET", "+FULL HELMET", "+ FULL HELMET", "+FULL BIKE HELMET", "+ FULL BIKE HELMET", "+BIKE HELMET", "+ BIKE HELMET", "& HELMET", "&HELMET", "+HELMEMT", "+ HELMENT" |
| Unknown            | "UNSURE IF HELMET", "UNSURE IF HELMETED", "UNSURE IF PT WEARING HELMET", "UNSURE IF PT WEARING A HELMET", "UNSURE IF PT WAS WEARING HELMET", "UNSURE IF PT WAS WEARING A HELMET", "UNKNOWN IF HELMET", "HELMET UNKNOWN", "UNKNOWN HELMET", "NO MENTION OF HELMET", "UNK HELMET", "HELMET UNK", "HELMET NS", "NS HELMET", "? HELMET", "?HELMET", "HELMET?"                                                                                                                                                                                                                                                                                                                                                                                                                                                                                                                                                                                                                                                                                                                                                    |

<sup>a</sup>NEISS: National Electronic Injury Surveillance System

## **eMethods. Comprehensive inputs (prompts) and outputs from ChatGPT-4 sessions.**

**November, 22 2023 (Low Detail Prompt)**

**You**

Spreadsheet

Parse through this data looking at column narrative\_1 make a table that includes if the cpsc\_case\_number was wearing a helmet, not wearing a helmet, or if helmet was not mentioned

**ChatGPT**

The dataset contains two columns: cpsc\_case\_number and narrative\_1. To create a new table that includes information about whether a helmet was worn, not worn, or not mentioned in narrative\_1 column, I'll parse through the narratives and categorize each case accordingly. Let's proceed with the analysis.

The new table has been created, which includes a column helmet\_use\_category categorizing each case as "Wearing helmet, 'Not wearing Helmet', or 'Helmet not mentioned', based on the information provided in the narrative\_1 column. The first few rows of the updated dataset show that in these instances, the helmet was not mentioned. If you need any further analysis or a different view of this data, please let me know.

**You**

Where is the table?

**ChatGPT**

The updated table with the helmet\_use\_category has been saved as a CSV file. You can download it using the link below:

[Download the Updated Table](#)

## December 07, 2023 (High Detail Prompt)

**You**

Spreadsheet

Here is a spreadsheet we will be working with.

**ChatGPT**

The spreadsheet contains data on bicycle-related incidents. Here are the columns in the dataset:

1. **Unnamed: 0**: This appears to be an index or identifier for each row.
2. **cpsc\_case\_number**: This column likely contains a unique case number for each incident.
3. **narrative\_1**: This column contains narratives or descriptions of the incidents.

Each row seems to represent a different incident involving bicycles, with details like the age and gender of the person involved, the nature of the incident, and whether a helmet was used.

How would you like to proceed with this data? Do you have any specific analysis or questions in mind?

**You**

For every cpsc\_case\_number there is a narrative\_1 with patient description and details of patient accident. For which case\_numbers does Narrative\_1 mention that the case number/patient was wearing/had a helmet at some point? Text in Narrative\_1 to help identify this could include language such as but not limited to: 'WITH A HELMET', 'WITH HELMET', 'POSITIVE FOR HELMET', 'POSITIVE FOR A HELMET', 'HELMETED', 'WEARING HELMET', 'WEARING A HELMET', 'W/ HELMET', 'W HELMET', 'WORE HELMET', 'W/HELMET', 'W/ A HELMET', 'HAD ON A HELMET', 'HAD ON HELMET', 'HAD HELMET', 'HAD A HELMET', 'HIS HELMET', 'HER HELMET', 'PT HELMET', 'PTS HELMET', 'WAS WEARING A HELMET', ',HELMET,', 'HELMETD', 'WHELMET', 'CRACKED HELMET', 'CRACKING HELMET', 'HELMET CRACKED', 'HELMET ON', 'BROKE HELMET', 'HELMET BROKE', 'BREAKING HELMET', 'POSITIVE HELMET', 'WORE HELMET', 'WEARING A BIKE HELMET', 'WEARING A FULL FACE HELMET', 'WEARING FULL FACE HELMET', '+HELMET', '+ HELMET', 'INCLUDING HELMET', ' FULL HELMET', '+FULL HELMET', '+ FULL HELMET', '+FULL BIKE HELMET', '+ FULL BIKE HELMET', 'PT'S HELMET', 'HELMET FELL', 'SMASHED HELMET', 'PLUS HELMET', 'HELMET WAS FRACTURED', 'HELMET WAS BROKEN', '+ BIKE HELMET', '+BIKE HELMET', 'WEARING BIKE HELMET', '+ HELMEMT', 'ENDORSES HELMET', 'HELMET WENT OFF', 'FULL FACE MASK HELMET', '& HELMET', 'HELMET WAS REPORTED TO BE CRACKED'

ChatGPT

**ChatGPT**

Error analyzing

It appears that the regular expression used to search for the specified keywords in the narratives encountered an error due to a special character or sequence. This issue can happen with characters like '+', '\*', '?', etc., which have special meanings in regular expressions. I will adjust the search method to handle these special characters correctly and then proceed to identify the case numbers. Let's try again.

I have identified the case numbers where the narrative mentions that the individual was wearing a helmet or had a helmet at some point. Here are the first 10 such case numbers:

4. 190106883
5. 190113371

6. 190114894
7. 190119860
8. 190130002
9. 190131680
10. 190131715
11. 190136254
12. 190137294
13. 190139436

In total, there are 8,032 cases in your dataset where the narrative includes a mention of a helmet.

### You

Looking over the initial csv file, for which case\_numbers does Narrative\_1 mention explicitly that the case number/patient was not wearing helmet at any point? Text in narrative\_1 to help identify this could include language such as but not limited to : 'NO HELMET', 'WITHOUT A HELMET', 'WITHOUT HELMET', 'NEGATIVE FOR HELMET', 'NEGATIVE FOR A HELMET', 'NOT HELMETED', '-HELMET', '- HELMET', 'NOT WEARING HELMET', 'NOT WEARING A HELMET', 'UNHELMETED', 'W/O HELMET', 'DID NOT HAVE ON A HELMET', 'NO WEARING HELMET', 'DID NOT HAVE A HELMET', 'DID NOT HAVE HELMET', 'W/O A HELMET', 'WITHOUT WEARING HELMET', 'WITHOUT WEARING A HELMET', 'WIHTOUT A HELMET', 'REMOVED HELMET', 'DENIED HELMET', 'DENIED USE OF HELMET', 'DENIED USE OF A HELMET', 'HELMETLESS', 'W/OUT HELMET', 'DENIES HELMET', 'WITH OUT HELMET', 'WITH OUT A HELMET', 'NOT WEAR A HELMET', 'NOT WEAR HELMET', 'WO A HELMET', 'NOT WEARIING HELMET', 'NOT WEARINNG A HELMET', 'NOT WEARIG', '-HELMET', 'NEGATIVE HELMET'

### ChatGPT

I have identified the case numbers where the narrative explicitly mentions that the individual was not wearing a helmet at any point. Here are the first 10 such case numbers:

14. 190103367
15. 190107357
16. 190116761
17. 190117791
18. 190118529
19. 190120791
20. 190123631
21. 190125036
22. 190127896
23. 190129996

In total, there are 6,003 cases in your dataset where the narrative includes a mention of the absence of a helmet.

### You

Looking at the original csv file, for which case\_numbers does Narrative\_1 not mention helmet(s) or mention helmet use unknown? Text in Narrative\_1 to help identify this could include language such as but not limited to: 'UNSURE IF HELMET', 'UNSURE IF HELMETED', 'UNSURE IF PT WEARING HELMET', 'UNSURE IF PT WEARING A HELMET', 'UNSURE IF PT WAS WEARING HELMET', 'UNSURE IF PT WAS WEARING A HELMET', 'UNKNOWN IF HELMET', 'HELMET UNKNOWN', 'UNKNOWN HELMET', 'NO MENTION OF HELMET', 'UNK HELMET', 'HELMET UNK', 'HELMET NS', 'NS HELMET', '?HELMET', '? HELMET', 'HELMET?'

2 / 2

ChatGPT

**ChatGPT**

I have identified two sets of case numbers based on the narrative's mention of helmets:

**24. Cases where helmet use is uncertain or unknown:**

- First 10 case numbers: 190110570, 190119860, 190123339, 190129926, 190201469, 190207661, 190236938, 190249335, 190305066, 190328681.
- Total number of such cases: 828.

**25. Cases where there is no mention of a helmet (excluding cases already identified as with or without helmet):**

- First 10 case numbers: 190103292, 190103345, 190103420, 190103432, 190104427, 190105465, 190105512, 190105523, 190105528, 190106393.
- Total number of such cases: 43,598.

These results help categorize the cases based on helmet usage or the lack of information regarding helmet usage in the narratives.

**You**

Could you make a csv file with `cpsc_case_number`, `Narrative_1`, and new column "helmet status". Based on their `Narrative_1` descriptions and criteria above categorize each case number "helmet not mentioned" or "not wearing helmet" or "wearing helmet" for all `case_numbers`. There should be no duplicate case numbers. Should be one-to-one. Double check for mistakes

**ChatGPT**

Error analyzing

It appears that there are duplicate `cpsc_case_number` entries in the dataset. I will first remove these duplicates to ensure a one-to-one mapping between `cpsc_case_number` and `helmet_status`. Let's proceed with this correction and then create the CSV file as requested.

The CSV file has been created with each `cpsc_case_number`, its corresponding `narrative_1`, and the newly added `helmet_status` column. The data is categorized based on whether the narrative mentioned "helmet not mentioned," "not wearing helmet," or "wearing helmet."

Duplicates have been removed to ensure a one-to-one correspondence.

You can download the file using the link below:

Download the CSV File

## December 12, 2023 (Intermediate Detail Prompt)

### ChatGPT

You've uploaded a file named "df\_helmet.csv". How can I assist you with this file?

### You

for every cpsc\_case\_number there is a narrative\_1 with patient description and details of a patient accident that involved an injury. based on their narrative\_1 descriptions, can you use the following criteria to create a new variable called "helmet\_status", which is generated by categorizing each case number into one of the following categories "helmet not mentioned" or "not wearing helmet" or "wearing helmet" using these criteria:

"helmet not mentioned": cpsc\_case\_numbers where narrative\_1 mentions that helmet use was unknown or that the term "helmet" was not recorded within narrative\_1. the narrative\_1 column could include any variation of the following phrases: "unsure if helmeted", "unknown if helmeted", "no mention of helmet", or "?helmet". please consider that there could be other phrases that indicate unknown helmet use.

"not wearing helmet": cpsc\_case\_numbers where narrative\_1 mentions that the case number/patient was not wearing a helmet at any point. the narrative\_1 column could include any variation of the following phrases: "no helmet" or "without helmet" or "not wearing helmet" or "unhelmeted". please consider that there could be other phrases that indicate the patient was not wearing a helmet.

"wearing helmet": cpsc\_case\_numbers where narrative\_1 mentions that the case number/patient was wearing/had a helmet at some point. the narrative\_1 column could include any variation of the following phrases: "with a helmet" or "had a helmet" or "cracked helmet" or "+ helmet". please consider that there could be other phrases that indicate the patient was wearing a helmet. can you make a csv file with cpsc\_case\_number, narrative\_1, and new column "helmet status" based on the criteria above?

### ChatGPT

The dataset contains columns for **cpsc\_case\_number** and **narrative\_1**. I will now create a new column, **helmet\_status**, based on the criteria you provided. This column will categorize each case number into one of the following categories: "helmet not mentioned", "not wearing helmet", or "wearing helmet". Let's proceed with the categorization.

The updated CSV file, which includes the new column **helmet\_status** based on the criteria you provided, has been created. You can download it using the following link.
