# Supplementary material for: Use of Generative AI to Identify Helmet Status Among Patients With Micromobility-Related Injuries From Unstructured Clinical Notes
Source: PubMed Central journal article supplement (PMC11322845; doi:10.1001/jamanetworkopen.2024.25981), 2024-08-13
Supplement: jamanetwopen-e2425981-s002.pdf [file jamanetwopen-e2425981-s002.pdf]

## Data Sharing Statement

Burford. Use of Generative AI to Identify Helmet Status Among Patients With Micromobility-Related Injuries From Unstructured Clinical Notes. *JAMA Netw Open*. Published August 13, 2024. doi:10.1001/jamanetworkopen.2024.25981

### Data

**Data available:** yes

**Data types:** deidentified participant data, data dictionary

**How to access data:** data is deidentified, publicly available at the NEISS query builder here:

<https://www.cpsc.gov/cgibin/neissquery/home.aspx> the data dictionary for NEISS is

here:[https://www.cpsc.gov/s3fs-public/January-2022-CPSC-Only-NT-NEISS-Coding-](https://www.cpsc.gov/s3fs-public/January-2022-CPSC-Only-NT-NEISS-Coding-Manual.pdf?VersionId=KSUoISeeOpWoGAXtq0Zb_EVaHSiOdzFe)

[Manual.pdf?VersionId=KSUoISeeOpWoGAXtq0Zb\\_EVaHSiOdzFe](https://www.cpsc.gov/s3fs-public/January-2022-CPSC-Only-NT-NEISS-Coding-Manual.pdf?VersionId=KSUoISeeOpWoGAXtq0Zb_EVaHSiOdzFe) the data and code will be

provided upon publication on Zenodo at the following link:

<https://doi.org/10.5281/zenodo.12724290>.

**When available:** With publication

### Supporting Documents

**Document types:** statistical/analytic code

**How to access documents:** code will be made available on Zenodo upon publication

**When available:** with publication

### Additional Information

**Who can access the data:** anyone requesting the data

**Types of analyses:** for any purposes

**Mechanisms of data availability:** with investigator support
